# Supplementary material
Source: MDPI journal article supplement (https://www.mdpi.com/2673-8937/2/3/36)
Supplement: s1 [file s1]

Article

# Significant differences in the reversal of cellular stress induced by hydrogen peroxide and corticosterone by the application of mirtazapine or L-Tryptophan

Ana Salomé Correia <sup>1,2</sup>, Armando Cardoso <sup>3,4,5</sup> Nuno Vale <sup>1,5,6,\*</sup>

<sup>1</sup> OncoPharma Research Group, Center for Health Technology and Services Research (CINTESIS), Rua Dr. Plácido da Costa, 4200-450 Porto, Portugal; anncorr07@gmail.com

<sup>2</sup> Institute of Biomedical Sciences Abel Salazar (ICBAS), University of Porto, Rua de Jorge Viterbo Ferreira, 228, 4050-313 Porto, Portugal

<sup>3</sup> NeuroGen Research Group, Center for Health Technology and Services Research (CINTESIS), Rua Dr. Plácido da Costa, 4200-450 Porto, Portugal

<sup>4</sup> Unit of Anatomy, Department of Biomedicine, Faculty of Medicine, University of Porto, Alameda Professor Hernâni Monteiro, 4200-319 Porto, Portugal

<sup>5</sup> CINTESIS@RISE, Faculty of Medicine, University of Porto, Al. Prof. Hernâni Monteiro, 4200-319 Porto, Portugal

<sup>6</sup> Department of Community Medicine, Information and Health Decision Sciences (MEDCIDS), Faculty of Medicine, University of Porto, Al. Prof. Hernâni Monteiro, 4200-319 Porto, Portugal

\*Correspondence: [nunovale@med.up.pt](mailto:nunovale@med.up.pt)

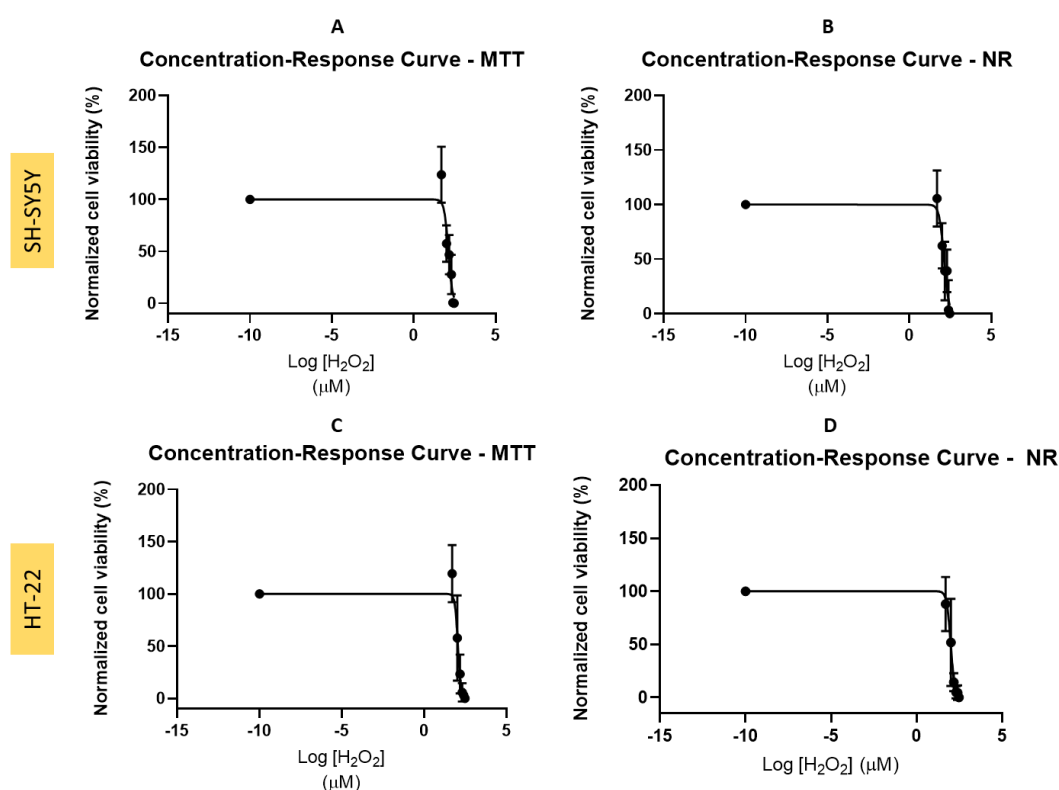

**Figure S1.** Concentration-response curves for increasing concentrations of H<sub>2</sub>O<sub>2</sub> on the viability of (A, B) SH-SY5Y cells and (C, D) HT-22 cells, for a period 48h, obtained by (A, C) MTT and (B, D) NR assays. The results are expressed as the percentage of each respective vehicle and represent the mean ± SEM of 3-6 independent experiments.

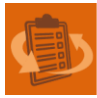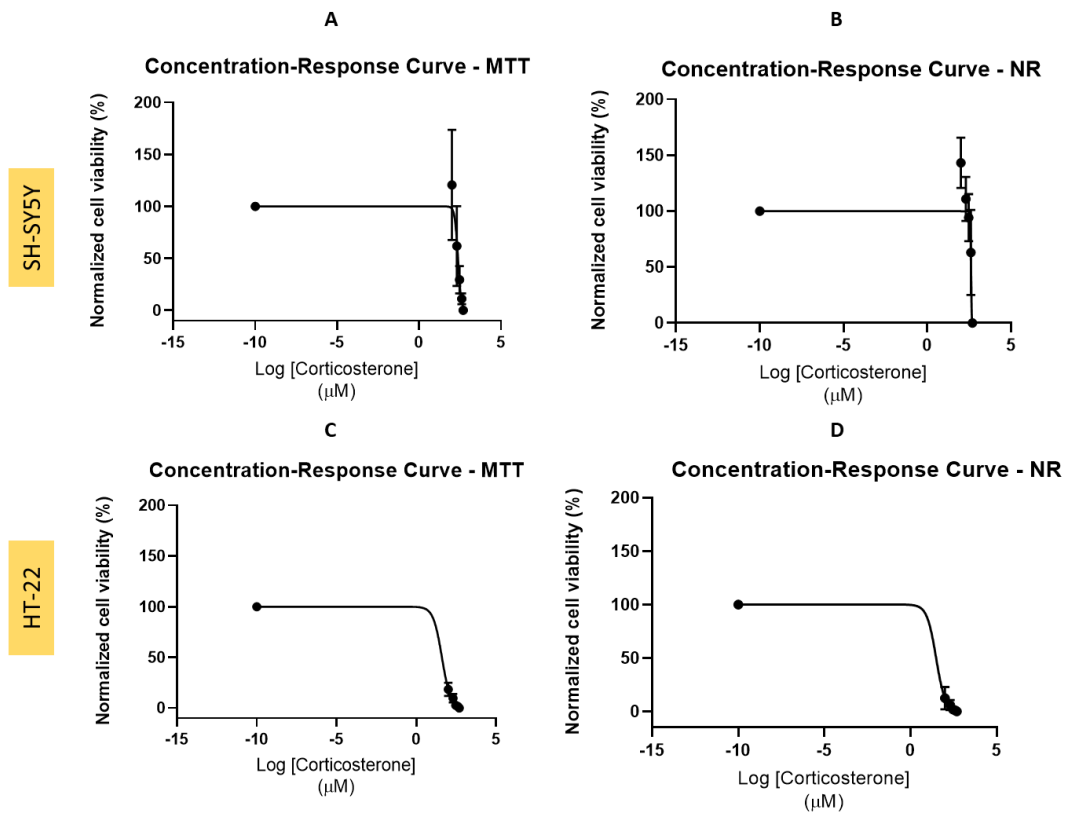

**Figure S2.** Concentration-response curves for increasing concentrations of corticosterone on the viability of (A, B) SH-SY5Y cells and (C, D) HT-22 cells, for a period 48h, obtained by (A, C) MTT and (B, D) NR assays. The results are expressed as the percentage of each respective vehicle and represent the mean  $\pm$  SEM of 3-6 independent experiments.
